# Supplementary material
Source: publisher figshare collection journal article supplement (https://diabetesjournals.figshare.com/ndownloader/files/39794611)

## Online-Only Supplemental Material

Supplemental Figure S1. Flow diagram

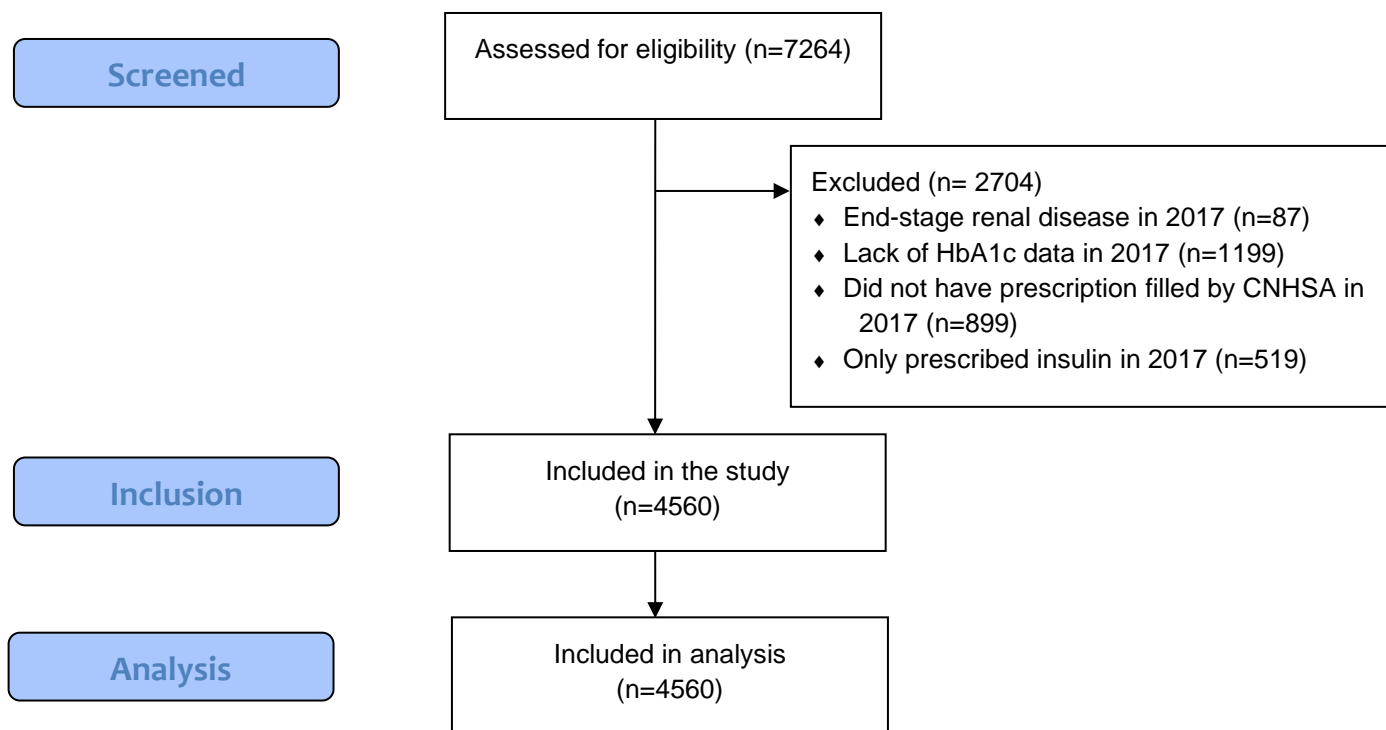

Supplement: Supplementary file 1 [file 39794611]
